# Supplementary material
Source: HighWire-hosted journal article supplement (https://tech.snmjournals.org/highwire/filestream/10507/field_highwire_adjunct_files/0/263905_Supplemental_Data.pdf)
Supplement: 263905_Supplemental_Data.pdf [file 263905_Supplemental_Data.pdf]

**Supplemental TABLE 1: Characteristics Associated with Blanching Defects at Each Evaluated Pressure Point**

| Blanching defect site         | Skull                   |                         |        | Scapulae                |                         |          | Sacrum                  |                           |        | Calcaneus                 |                         |       |
|-------------------------------|-------------------------|-------------------------|--------|-------------------------|-------------------------|----------|-------------------------|---------------------------|--------|---------------------------|-------------------------|-------|
|                               | Absent                  | Present                 | P      | Absent                  | Present                 | P        | Absent                  | Present                   | P      | Absent                    | Present                 | P     |
| <b>Age (yrs)</b>              | 56.2±14.7<br>(26-89)    | 64.8±14.5<br>(29-83)    | 0.019* | 53.2±14.3<br>(26-83)    | 66.1±13<br>(26-89)      | <0.0001* | 56.8±15.3<br>(26-89)    | 65.1±13<br>(37-83)        | 0.037* | 62.3±15.9<br>(30-83)      | 55.3±15.8<br>(26-89)    | 0.233 |
| <b>Weight (kg)</b>            | 85.8±16.1<br>(53-131.7) | 87.7±19.5<br>(53.1-148) | 0.650  | 86.2±19.5<br>(53-148)   | 86.7±13.7<br>(59-119)   | 0.907    | 87.9±18.6<br>(53-148)   | 81.8±10.5<br>(68.4-102.5) | 0.079  | 79.7±11.8<br>(57.8-101.2) | 83.4±15.5<br>(53-113)   | 0.505 |
| <b>Height (cm)</b>            | 173±10<br>(152-196)     | 176±10<br>(160-196)     | 0.200  | 171±10<br>(152-193)     | 178±8<br>(165-196)      | 0.002*   | 173±9<br>(152.4-193)    | 178±9<br>(163-196)        | 0.047* | 173±6<br>(165-180)        | 171±9<br>(152-196)      | 0.514 |
| <b>BMI (kg/m<sup>2</sup>)</b> | 28.6±4.9<br>(19.4-40.4) | 28.2±5.9<br>(19.4-46.8) | 0.769  | 29.3±5.8<br>(19.4-46.8) | 27.4±4.3<br>(19.4-36.6) | 0.118    | 29.3±5.5<br>(19.4-46.8) | 25.9±3.1<br>(19.4-31.1)   | 0.001* | 26.7±3.5<br>(20-32)       | 28.7±5.2<br>(19.4-40.4) | 0.277 |
| <b>Injected dose (MBq)</b>    | 244±143<br>(17-394)     | 283±92<br>(18-370)      | 0.159  | 235±145<br>(17-394)     | 283±104<br>(19-392)     | 0.092    | 239±137<br>(17-394)     | 308±90<br>(21-390)        | 0.016* | 251±144<br>(17-379)       | 239±143<br>(18-394)     | 0.829 |
| <b>Fasting duration (Hrs)</b> | 9.6±3.6<br>(4-20)       | 8.0±3.7<br>(4-16)       | 0.078  | 9.9±3.1<br>(4-18)       | 8.1±4.2<br>(4-20)       | 0.045*   | 9.1±3.8<br>(4-20)       | 9.1±3.4<br>(4-15)         | 0.999  | 9.3±3<br>(4-12)           | 9.7±3.7<br>(4-20)       | 0.805 |
| <b>Blood glucose (mg/dL)</b>  | 94.1±20.5<br>(39-154)   | 99.5±5.8<br>(92-105)    | 0.531  | 94.1±19.9<br>(39-154)   | 97.6±17.6<br>(65-128)   | 0.614    | 94.3±20.6<br>(39-154)   | 96.8±14.3<br>(79-128)     | 0.720  | 105.3±30.9<br>(79-154)    | 92.4±16.9<br>(39-130)   | 0.325 |
| <b>Sex</b>                    |                         |                         |        |                         |                         |          |                         |                           |        |                           |                         |       |
| <i>Female</i>                 | 15                      | 3                       | 0.156  | 17                      | 1                       | <0.0001* | 17                      | 1                         | 0.033* | 2                         | 16                      | 0.688 |
| <i>Male</i>                   | 38                      | 21                      |        | 26                      | 33                      |          | 41                      | 18                        |        | 7                         | 31                      |       |
| <b>BMI categories</b>         |                         |                         |        |                         |                         |          |                         |                           |        |                           |                         |       |
| <i>Normal</i>                 | 11                      | 7                       | 0.736  | 9                       | 9                       | 0.447    | 11                      | 7                         | 0.043* | 3                         | 11                      | 0.342 |
| <i>Overweight</i>             | 25                      | 10                      |        | 18                      | 17                      |          | 25                      | 10                        |        | 5                         | 19                      |       |
| <i>Obese</i>                  | 17                      | 7                       |        | 16                      | 8                       |          | 22                      | 2                         |        | 1                         | 17                      |       |
| <b>Disease</b>                |                         |                         |        |                         |                         |          |                         |                           |        |                           |                         |       |
| <i>Cancer</i>                 | 19                      | 18                      | 0.006* | 11                      | 26                      | <0.0001* | 26                      | 11                        | 0.662  | 5                         | 14                      | 0.362 |
| <i>CVD</i>                    | 8                       | 2                       |        | 9                       | 1                       |          | 8                       | 2                         |        | 1                         | 7                       |       |
| <i>Healthy</i>                | 26                      | 4                       |        | 23                      | 7                       |          | 24                      | 6                         |        | 3                         | 26                      |       |
| <b>Used tracer</b>            |                         |                         |        |                         |                         |          |                         |                           |        |                           |                         |       |

| Blanching defect site               | Skull  |         |          | Scapulae |         |          | Sacrum |         |          | Calcaneus |         |          |
|-------------------------------------|--------|---------|----------|----------|---------|----------|--------|---------|----------|-----------|---------|----------|
|                                     | Absent | Present | <i>P</i> | Absent   | Present | <i>P</i> | Absent | Present | <i>P</i> | Absent    | Present | <i>P</i> |
| <i>FDG</i>                          | 41     | 6       | <0.0001* | 37       | 10      | <0.0001* | 37     | 10      | 0.425    | 6         | 35      | 0.688    |
| <i>Fluciclovine</i>                 | 12     | 18      |          | 6        | 24      |          | 21     | 9       |          | 3         | 12      |          |
| <b>Injected activity</b>            |        |         |          |          |         |          |        |         |          |           |         |          |
| <i>Low dose</i>                     | 13     | 2       | 0.160    | 11       | 4       | 0.009*   | 14     | 1       | 0.185    | 2         | 12      | 1.000    |
| <i>Intermediate dose</i>            | 8      | 2       |          | 9        | 1       |          | 8      | 2       |          | 1         | 7       |          |
| <i>Standard dose</i>                | 32     | 20      |          | 23       | 29      |          | 36     | 16      |          | 6         | 28      |          |
| <b>Arms position</b>                |        |         |          |          |         |          |        |         |          |           |         |          |
| <i>Above</i>                        | 11     | 18      | <0.0001* | 5        | 24      | <0.0001* | 20     | 9       | 0.414    | 3         | 12      | 0.688    |
| <i>Side</i>                         | 42     | 6       |          | 38       | 10      |          | 38     | 10      |          | 6         | 35      |          |
| <b>AC CT Dose</b>                   |        |         |          |          |         |          |        |         |          |           |         |          |
| <i>Ultra-Low-dose</i>               | 34     | 6       | 0.003*   | 32       | 8       | <0.0001* | 32     | 8       | 0.429    | 4         | 33      | 0.247    |
| <i>Low-dose</i>                     | 19     | 18      |          | 11       | 26      |          | 26     | 11      |          | 5         | 14      |          |
| <b>Fused PET/CT misregistration</b> |        |         |          |          |         |          |        |         |          |           |         |          |
| <i>No</i>                           | 39     | 21      | 0.240    | 33       | 27      | 1.000    | 45     | 15      | 1.000    | 5         | 35      | 0.259    |
| <i>Yes</i>                          | 14     | 3       |          | 10       | 7       |          | 13     | 4       |          | 65        | 12      |          |
| <b>Knee cushion</b>                 |        |         |          |          |         |          |        |         |          |           |         |          |
| <i>No</i>                           | 3      | 0       | 0.548    | 2        | 1       | 1.000    | 2      | 1       | 1.000    | 1         | 2       | 0.415    |
| <i>Yes</i>                          | 50     | 24      |          | 41       | 33      |          | 56     | 18      |          | 8         | 45      |          |
| <b>Back cushion</b>                 |        |         |          |          |         |          |        |         |          |           |         |          |
| <i>No</i>                           | 49     | 24      | 0.304    | 40       | 33      | 0.626    | 54     | 19      | 0.567    | 8         | 45      | 0.259    |
| <i>Yes</i>                          | 4      | 0       |          | 3        | 1       |          | 4      | 0       |          | 1         | 2       |          |

\* Statistically significant

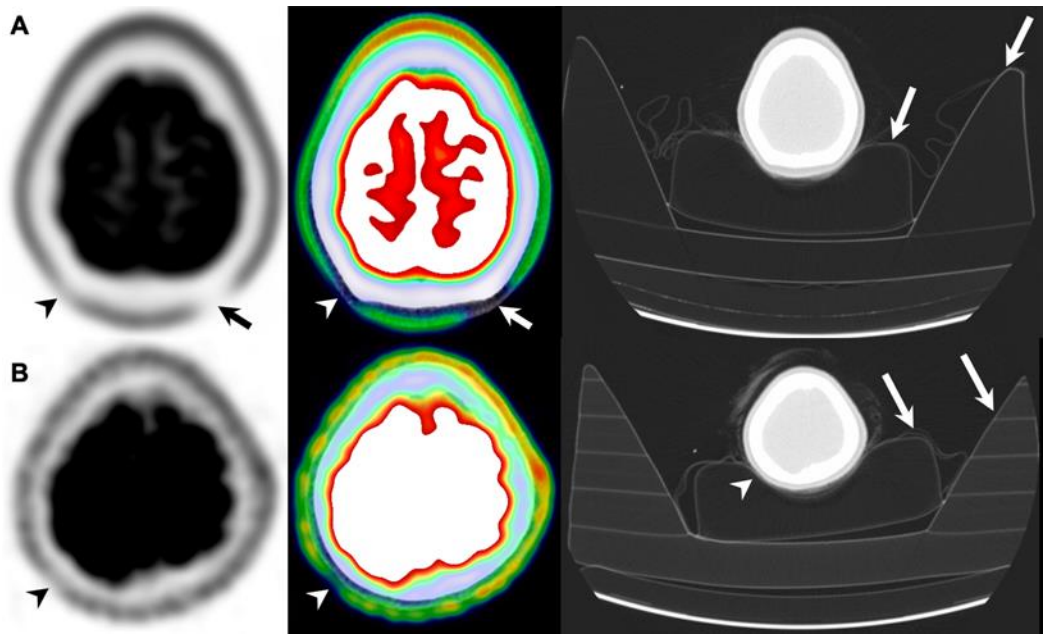

Supplemental Figure 1.

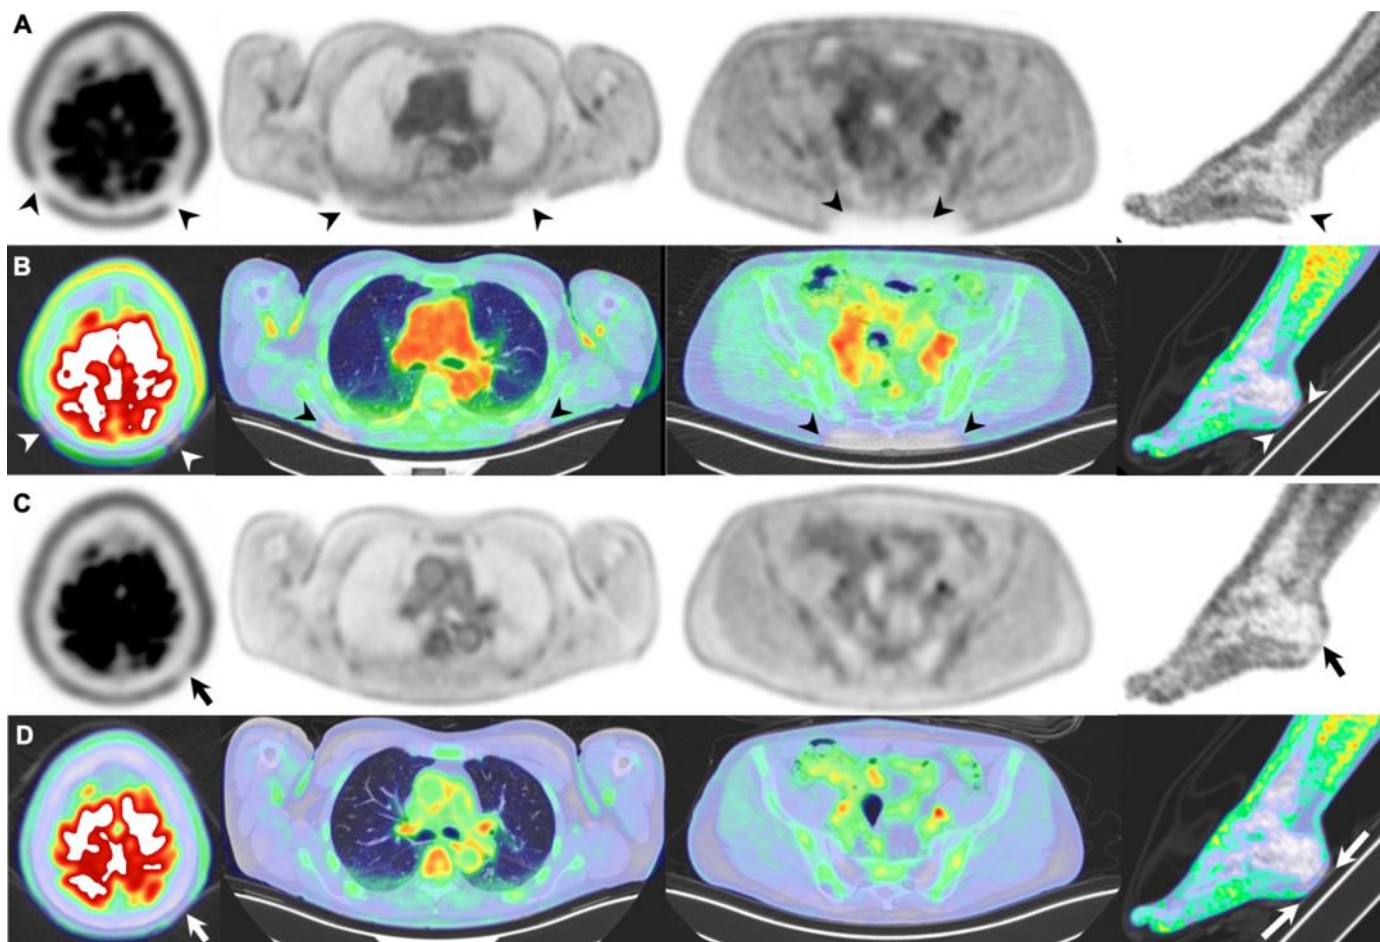

Supplemental Figure 2.

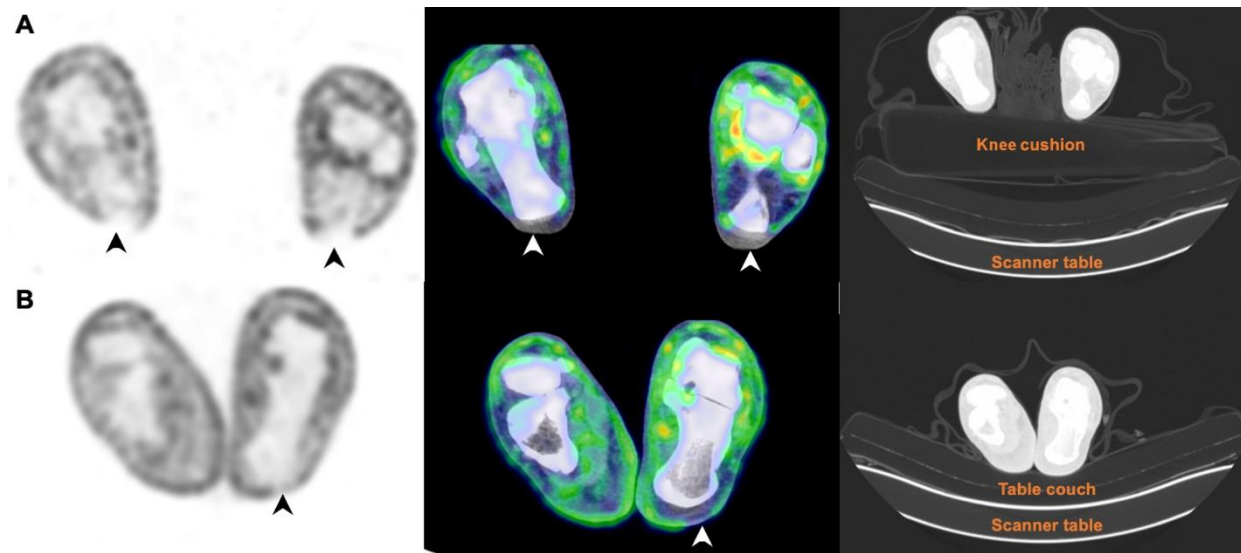

Supplemental Figure 3.

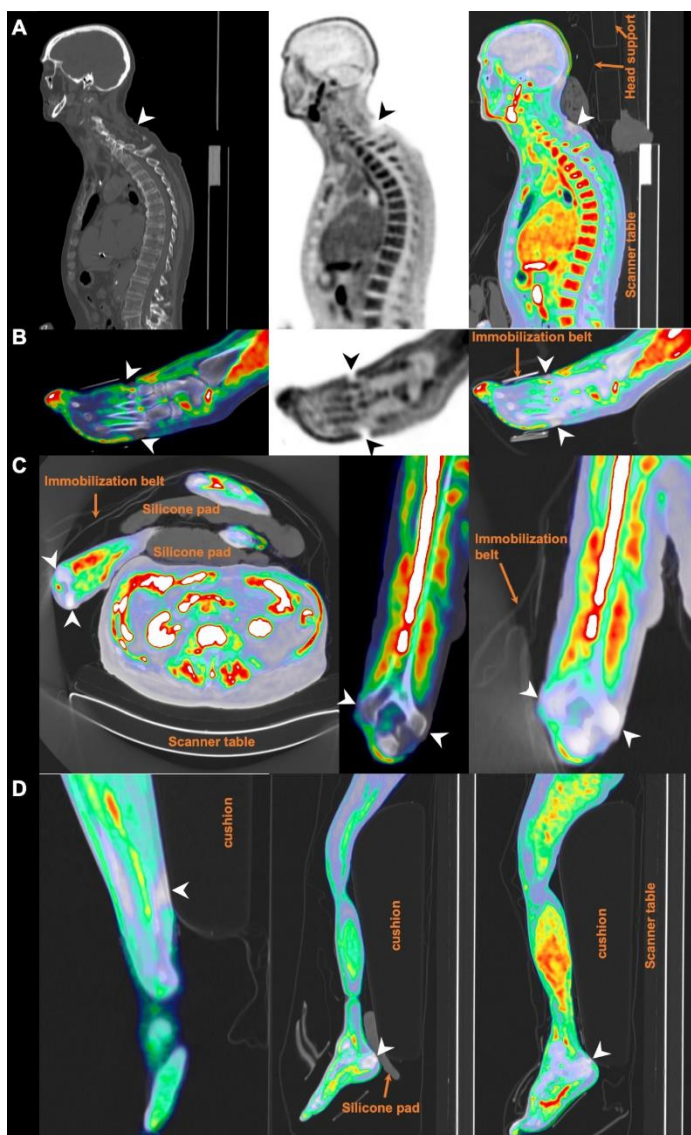

Supplemental Figure 4.
